# Supplementary material
Source: MDPI journal article supplement (https://www.mdpi.com/2075-4701/11/5/820)
Supplement: s1 [file s1]

# Hydrometallurgical Recycling Process for Mobile Phones Printed Circuit Boards Using Ozone

Silvie Brožová <sup>1</sup>, Magdalena Lisínska <sup>2</sup>, Mariola Saturnus <sup>2</sup>, Bernadeta Gajda <sup>3</sup>, Grażyna Simha Martynková <sup>4</sup>, Aleš Slíva <sup>5,\*</sup>

<sup>1</sup> Department of Non-ferrous Metals, Refining and Recycling, VŠB-Technical University of Ostrava, 17. listopadu 15/2172, 708 00 Ostrava-Poruba, Czech Republic, silvie.brozova@vsb.cz

<sup>2</sup> Silesian University of Technology, Faculty of Engineering Materials, Department of Metallurgy and Recycling, Krasińskiego 8, 40-019 Katowice, Poland,

<sup>3</sup> Czestochowa University of Technology, Faculty of Production engineering and Materials Technology, Department of Metals Extraction and Recycling, Dąbrowskiego 69, 42-201 Częstochowa, Poland

<sup>4</sup> Nanotechnology Centre, CEET, VŠB - Technical University of Ostrava, 17. listopadu 15/2172, 708 00 Ostrava - Poruba, Czech Republic, grazyna.simah@vsb.cz

<sup>5</sup> Institute of Transport, Faculty of Mechanical Engineering, VŠB - Technical University of Ostrava, 17. listopadu 15/2172, 708 00 Ostrava - Poruba, Czech Republic ales.sliva@vsb.cz

\* Correspondence: ales.sliva@vsb.cz; Tel: +420 596 995 110

The metal leaching efficiency was calculated by Eq.1:

$$R = \frac{V_r \cdot C_i}{m_p \cdot \frac{x_i}{100}} \cdot 100\% \quad (1)$$

where R is the metal leaching efficiency,  $V_r$  is the leach liquor volume [dm<sup>3</sup>],  $C_i$  is the concentrations of metal in the leach liquor [g/dm<sup>3</sup>],  $m_p$  is the mass of PCB, and  $x_i$  is the metal mass fraction [%].

The 5g sample for analysis was prepared as a pressed pellet (5g PCB ground). (The result in the Table 1 is the average of 3 samples).  $V_r$  was assumed for the calculations - the volume of the solution measured after 4 h (after the experiment). At the beginning there was 200ml, after 2 hours less solution and after 4 h even less. For example, 150ml left.

The results in the table differ after 2h and 4h. Which affects the final result of the leaching degree.

**Table 1.** Copper concentration obtained after leaching in HNO<sub>3</sub>, HCl and H<sub>2</sub>SO<sub>4</sub> with the addition of H<sub>2</sub>O<sub>2</sub> or O<sub>3</sub> within 2 and 4 hours.

| Leaching agent                 | Additional oxidiser           | Temperature [K] | Concentration %<br>2h | Concentration %<br>4h |
|--------------------------------|-------------------------------|-----------------|-----------------------|-----------------------|
| HCl                            | H <sub>2</sub> O <sub>2</sub> | 298             | 20.18                 | 18.24                 |
| H <sub>2</sub> SO <sub>4</sub> | H <sub>2</sub> O <sub>2</sub> |                 | 19.32                 | 13.70                 |
| HCl                            | O <sub>3</sub>                |                 | 0.88                  | 4.82                  |
| H <sub>2</sub> SO <sub>4</sub> | O <sub>3</sub>                |                 | 0.77                  | 2.72                  |
| HNO <sub>3</sub>               |                               | 313             | 100.00                | 91.30                 |
| HCl                            | H <sub>2</sub> O <sub>2</sub> |                 | 82.28                 | 78.06                 |
| H <sub>2</sub> SO <sub>4</sub> | H <sub>2</sub> O <sub>2</sub> |                 | 26.09                 | 24.83                 |
| HCl                            | O <sub>3</sub>                |                 | 14.88                 | 26.51                 |
| H <sub>2</sub> SO <sub>4</sub> | O <sub>3</sub>                | 353             | 2.89                  | 17.63                 |
| HNO <sub>3</sub>               |                               |                 | 96.92                 | 74.79                 |
| HCl                            | H <sub>2</sub> O <sub>2</sub> |                 | 24.79                 | 28.51                 |
| H <sub>2</sub> SO <sub>4</sub> | H <sub>2</sub> O <sub>2</sub> |                 | 18.10                 | 15.49                 |
| HCl                            | O <sub>3</sub>                |                 | 40.11                 | 70.17                 |
| H <sub>2</sub> SO <sub>4</sub> | O <sub>3</sub>                |                 | 3.49                  | 5.21                  |

|                  |        |       |
|------------------|--------|-------|
| HNO <sub>3</sub> | 100.00 | 79.96 |
|------------------|--------|-------|

**Table 2.** Tin concentration obtained after leaching in HNO<sub>3</sub>, HCl and H<sub>2</sub>SO<sub>4</sub> with the addition of H<sub>2</sub>O<sub>2</sub> or O<sub>3</sub> within 2 and 4 hours.

| Leaching agent                 | Additional oxidiser           | Temperature [K] | Concentration [g/dm <sup>3</sup> ] |        |
|--------------------------------|-------------------------------|-----------------|------------------------------------|--------|
|                                |                               |                 | 2h                                 | 4h     |
| HCl                            | H <sub>2</sub> O <sub>2</sub> | 298             | 100.00                             | 100.00 |
| H <sub>2</sub> SO <sub>4</sub> | H <sub>2</sub> O <sub>2</sub> |                 | 4.57                               | 6.21   |
| HCl                            | O <sub>3</sub>                |                 | 26.91                              | 24.39  |
| H <sub>2</sub> SO <sub>4</sub> | O <sub>3</sub>                |                 | 9.96                               | 8.56   |
| HNO <sub>3</sub>               |                               |                 |                                    |        |
| HCl                            | H <sub>2</sub> O <sub>2</sub> | 313             | 9.56                               | 100.00 |
| H <sub>2</sub> SO <sub>4</sub> | H <sub>2</sub> O <sub>2</sub> |                 | 1.51                               | 1.35   |
| HCl                            | O <sub>3</sub>                |                 |                                    | 100.00 |
| H <sub>2</sub> SO <sub>4</sub> | O <sub>3</sub>                |                 | 3.87                               | 5.15   |
| HNO <sub>3</sub>               |                               |                 |                                    |        |
| HCl                            | H <sub>2</sub> O <sub>2</sub> | 353             | 47.69                              | 100.00 |
| H <sub>2</sub> SO <sub>4</sub> | H <sub>2</sub> O <sub>2</sub> |                 | 1.46                               | 1.30   |
| HCl                            | O <sub>3</sub>                |                 | 100.00                             | 100.00 |
| H <sub>2</sub> SO <sub>4</sub> | O <sub>3</sub>                |                 | 1.40                               | 5.92   |
| HNO <sub>3</sub>               |                               |                 |                                    |        |

**Table 3.** Gold and silver concentration obtained after leaching in HNO<sub>3</sub>, HCl and H<sub>2</sub>SO<sub>4</sub> with the addition of H<sub>2</sub>O<sub>2</sub> or O<sub>3</sub> within 2 and 4 hours.

| Leaching agent                 | Additional oxidiser           | Temperature [K] | Concentration Au [g/dm <sup>3</sup> ] |       |
|--------------------------------|-------------------------------|-----------------|---------------------------------------|-------|
|                                |                               |                 | 2h                                    | 4h    |
| HCl                            | H <sub>2</sub> O <sub>2</sub> | 298             | 2.72                                  | 2.84  |
| HCl                            | H <sub>2</sub> O <sub>2</sub> | 353             | 7.61                                  | 12.46 |
| HCl                            | O <sub>3</sub>                | 313             | 0.92                                  | 2.95  |
| HCl                            | O <sub>3</sub>                | 353             | 6.89                                  | 5.46  |
| Leaching agent                 | Additional oxidiser           | Temperature [K] | Concentration Ag [g/dm <sup>3</sup> ] |       |
|                                |                               |                 | 2h                                    | 4h    |
| H <sub>2</sub> SO <sub>4</sub> | O <sub>3</sub>                | 313             |                                       | 1.62  |
| HCl                            | O <sub>3</sub>                | 353             | 1.83                                  | 12.94 |
